# Supplementary material
Source: MDPI journal article supplement (https://www.mdpi.com/2071-1050/14/5/2765)
Supplement: s1 [file s1]

**Versión adaptada el contexto de educación superior en México de la Escala de Habilidades para la Vida**

|                                                                                |                          |                      |                |                   |                       |
|--------------------------------------------------------------------------------|--------------------------|----------------------|----------------|-------------------|-----------------------|
| <u><b>Trabajo en equipo</b></u>                                                |                          |                      |                |                   |                       |
| <b>Soy capaz de...</b>                                                         | <b>Muy en desacuerdo</b> | <b>En desacuerdo</b> | <b>Neutral</b> | <b>De acuerdo</b> | <b>Muy de acuerdo</b> |
| Trabajar bien dentro de un equipo/grupo.                                       | 1                        | 2                    | 3              | 4                 | 5                     |
| Ayudar a otro miembro del equipo/grupo a realizar una tarea.                   | 1                        | 2                    | 3              | 4                 | 5                     |
| Aceptar sugerencias para mejorar por parte de otros.                           | 1                        | 2                    | 3              | 4                 | 5                     |
| Trabajar con otros por el bien del equipo/grupo.                               | 1                        | 2                    | 3              | 4                 | 5                     |
| Ayudar a construir el espíritu (pertenencia y participación) del equipo/grupo. | 1                        | 2                    | 3              | 4                 | 5                     |
| Sugerir a los miembros del equipo/grupo cómo pueden mejorar su desempeño.      | 1                        | 2                    | 3              | 4                 | 5                     |
| Cambiar la forma en que me desempeño para el beneficio del equipo/grupo.       | 1                        | 2                    | 3              | 4                 | 5                     |
| <u><b>Establecimiento de metas</b></u>                                         |                          |                      |                |                   |                       |
| <b>Soy capaz de...</b>                                                         | <b>Muy en desacuerdo</b> | <b>En desacuerdo</b> | <b>Neutral</b> | <b>De acuerdo</b> | <b>Muy de acuerdo</b> |
| Establecer metas para que pueda seguir enfocado en mejorar.                    | 1                        | 2                    | 3              | 4                 | 5                     |
| Establecer metas desafiantes.                                                  | 1                        | 2                    | 3              | 4                 | 5                     |
| Revisar el progreso hacia mis metas.                                           | 1                        | 2                    | 3              | 4                 | 5                     |
| Establecer metas a corto plazo para lograr metas a largo plazo.                | 1                        | 2                    | 3              | 4                 | 5                     |
| Mantenerme comprometido con mis metas.                                         | 1                        | 2                    | 3              | 4                 | 5                     |
| Establecer metas para mis actividades (por ejemplo: práctica, estudios).       | 1                        | 2                    | 3              | 4                 | 5                     |
| Establecer metas específicas.                                                  | 1                        | 2                    | 3              | 4                 | 5                     |
| <u><b>Gestión del tiempo</b></u>                                               |                          |                      |                |                   |                       |
| <b>Soy capaz de...</b>                                                         | <b>Muy en desacuerdo</b> | <b>En desacuerdo</b> | <b>Neutral</b> | <b>De acuerdo</b> | <b>Muy de acuerdo</b> |
| Gestionar bien mi tiempo.                                                      | 1                        | 2                    | 3              | 4                 | 5                     |
| Evaluar cuánto tiempo paso en varias actividades.                              | 1                        | 2                    | 3              | 4                 | 5                     |
| Controlar el uso de mi tiempo.                                                 | 1                        | 2                    | 3              | 4                 | 5                     |
| Establecer metas para usar mi tiempo de manera efectiva.                       | 1                        | 2                    | 3              | 4                 | 5                     |
| <u><b>Habilidades emocionales</b></u>                                          |                          |                      |                |                   |                       |
| <b>Soy capaz de...</b>                                                         | <b>Muy en desacuerdo</b> | <b>En desacuerdo</b> | <b>Neutral</b> | <b>De acuerdo</b> | <b>Muy de acuerdo</b> |

|                                                                         |                          |                      |                |                   |                       |
|-------------------------------------------------------------------------|--------------------------|----------------------|----------------|-------------------|-----------------------|
| Notar cómo me siento.                                                   | 1                        | 2                    | 3              | 4                 | 5                     |
| Enfrentar mis emociones.                                                | 1                        | 2                    | 3              | 4                 | 5                     |
| Entender que me comporto diferente según mis emociones.                 | 1                        | 2                    | 3              | 4                 | 5                     |
| Usar mis emociones para mantenerme concentrado.                         | 1                        | 2                    | 3              | 4                 | 5                     |
| <b><u>Comunicación</u></b>                                              |                          |                      |                |                   |                       |
| <b>Soy capaz de...</b>                                                  | <b>Muy en desacuerdo</b> | <b>En desacuerdo</b> | <b>Neutral</b> | <b>De acuerdo</b> | <b>Muy de acuerdo</b> |
| Hablarle claramente a los demás.                                        | 1                        | 2                    | 3              | 4                 | 5                     |
| Prestar atención a lo que alguien está diciendo.                        | 1                        | 2                    | 3              | 4                 | 5                     |
| Prestar atención al lenguaje corporal de las personas.                  | 1                        | 2                    | 3              | 4                 | 5                     |
| Comunicarme bien con los demás.                                         | 1                        | 2                    | 3              | 4                 | 5                     |
| <b><u>Habilidades sociales</u></b>                                      |                          |                      |                |                   |                       |
| <b>Soy capaz de...</b>                                                  | <b>Muy en desacuerdo</b> | <b>En desacuerdo</b> | <b>Neutral</b> | <b>De acuerdo</b> | <b>Muy de acuerdo</b> |
| Iniciar una conversación.                                               | 1                        | 2                    | 3              | 4                 | 5                     |
| Interactuar en varios entornos sociales.                                | 1                        | 2                    | 3              | 4                 | 5                     |
| Ayudar a otros sin que me lo pidan.                                     | 1                        | 2                    | 3              | 4                 | 5                     |
| Participar en actividades grupales.                                     | 1                        | 2                    | 3              | 4                 | 5                     |
| Mantener amistades cercanas.                                            | 1                        | 2                    | 3              | 4                 | 5                     |
| <b><u>Liderazgo</u></b>                                                 |                          |                      |                |                   |                       |
| <b>Soy capaz de...</b>                                                  | <b>Muy en desacuerdo</b> | <b>En desacuerdo</b> | <b>Neutral</b> | <b>De acuerdo</b> | <b>Muy de acuerdo</b> |
| Influir positivamente a un grupo de personas.                           | 1                        | 2                    | 3              | 4                 | 5                     |
| Organizar a los miembros de un equipo/grupo para trabajar juntos.       | 1                        | 2                    | 3              | 4                 | 5                     |
| Motivar a otros.                                                        | 1                        | 2                    | 3              | 4                 | 5                     |
| Ayudar a otros a resolver sus problemas de desempeño.                   | 1                        | 2                    | 3              | 4                 | 5                     |
| Considerar las opiniones individuales de cada miembro del equipo/grupo. | 1                        | 2                    | 3              | 4                 | 5                     |
| Ser un buen modelo a seguir para otros.                                 | 1                        | 2                    | 3              | 4                 | 5                     |
| Establecer estándares altos para el equipo/grupo.                       | 1                        | 2                    | 3              | 4                 | 5                     |
| Reconocer los logros de otras personas.                                 | 1                        | 2                    | 3              | 4                 | 5                     |
| <b><u>Resolución de problemas</u></b>                                   |                          |                      |                |                   |                       |
|                                                                         | <b>Muy en</b>            | <b>En</b>            | <b>Neutral</b> | <b>De</b>         | <b>Muy</b>            |

| <b>Soy capaz de...</b>                                        | <b>desacuerdo</b> | <b>desacuerdo</b> |   | <b>acuerdo</b> | <b>de acuerdo</b> |
|---------------------------------------------------------------|-------------------|-------------------|---|----------------|-------------------|
| Pensar cuidadosamente acerca de un problema.                  | 1                 | 2                 | 3 | 4              | 5                 |
| Comparar cada solución posible para encontrar la mejor.       | 1                 | 2                 | 3 | 4              | 5                 |
| Crear la mayor cantidad de soluciones posibles a un problema. | 1                 | 2                 | 3 | 4              | 5                 |
| Evaluar una solución a un problema.                           | 1                 | 2                 | 3 | 4              | 5                 |
